# Supplementary material for: Evaluation of a city-wide school-located influenza vaccination program in Oakland, California, with respect to vaccination coverage, school absences, and laboratory-confirmed influenza: A matched cohort study
Source: PubMed Central journal article supplement (PMC7433855; doi:10.1371/journal.pmed.1003238), 2020-08-18
Supplement: pmed.1003238.s002.pdf [file pmed.1003238.s002.pdf]

*Appendix to Evaluation of a city-wide school-located influenza vaccination program in Oakland, California with respect to vaccination coverage, school absences, and laboratory-confirmed influenza: a matched cohort study*

**S1 Appendix. Selection of schools for the vaccine coverage survey**

**Matching of school pairs**

We used a two-stage matching algorithm to select intervention and control schools in order to account for co-located schools (i.e., schools at the same location), which are likely to have highly correlated transmission dynamics and cannot be treated as independent units. In the first stage, we used the Genetic multivariate matching algorithm [40] to match all K-5 or K-6 non-charter, public schools in each district. We treated co-located schools as independent units during this step. For any co-located schools for which both schools were selected, we chose to keep the school with the smaller generalized Mahalanobis distance to its pair. We excluded the other school in the pair from the matching process. If only one school in a co-located pair matched in the first stage, we dropped its pair from the second stage. In the second stage, we repeated the matching process again following the removal of co-located school pairs, identifying matched 34 school-pairs.

**Selection of 22 school pairs for the vaccine coverage survey**

We selected schools for the vaccine coverage survey using two metrics: 1) similarity of schools within pairs and 2) representativeness of district-level characteristics. To measure the similarity of schools within pairs, we calculated the generalized Mahalanobis distance between each pair of schools. To assess representativeness, we calculated the percent difference in the mean/percentage pre-intervention school-level characteristics from the California Department of Education for each school vs. the mean across all schools in a given district (N=50 elementary schools in Oakland, N=34 schools in West Contra Costa). We then took the sum of the absolute value of differences for each pair of schools. To assess dissimilarity between each school and its district, we calculated the mean of the absolute value of the sum of differences. Schools with the smallest value of dissimilarity were the most similar to their district as a whole. We chose the 22 schools with the smallest dissimilarity and distance values. One school pair was excluded from consideration by the recommendation of the district due to concerns about potential poor response rates (Stege Elementary / Lafayette Elementary).

**Table A. Pre-intervention school-level characteristics in the program and comparison site**

| Characteristic                       | All schools |              |                         | Matched schools |              |                         |
|--------------------------------------|-------------|--------------|-------------------------|-----------------|--------------|-------------------------|
|                                      | Comparison  | Intervention | Standardized difference | Comparison      | Intervention | Standardized difference |
| Mean enrollment                      | 478.9       | 380.0        | -35.3                   | 478.9           | 391.1        | -30.5                   |
| Mean class size                      | 26.1        | 23.2         | -18.1                   | 26.1            | 23.0         | -19.2                   |
| Race (%)                             |             |              |                         |                 |              |                         |
| Asian                                | 10.5        | 10.6         | 1.7                     | 10.5            | 11.2         | 7.6                     |
| Pacific Islander                     | 0.9         | 1.1          | 24.7                    | 0.9             | 1.2          | 28.4                    |
| Filipino                             | 4.7         | 0.7          | -93.7                   | 4.7             | 0.8          | -91.1                   |
| Hispanic                             | 51.7        | 40.7         | -32.5                   | 51.7            | 38.8         | -39.6                   |
| African American                     | 18.5        | 29.6         | 50.1                    | 18.5            | 30.3         | 52.3                    |
| White                                | 12.3        | 12.3         | -0.2                    | 12.3            | 12.6         | 2.2                     |
| Mixed Race                           | 1.1         | 3.3          | 84.1                    | 1.1             | 3.5          | 87.7                    |
| Parents' highest education level (%) |             |              |                         |                 |              |                         |
| Less than high school                | 24.9        | 26.5         | 6.6                     | 24.9            | 26.2         | 5.6                     |
| High school                          | 36.6        | 24.3         | -63.8                   | 36.6            | 23.0         | -73.4                   |
| Some college                         | 16.9        | 20.7         | 24.5                    | 16.9            | 20.9         | 25.5                    |

|                                         |       |       |       |       |       |       |
|-----------------------------------------|-------|-------|-------|-------|-------|-------|
| Bachelor's degree                       | 15.6  | 15.2  | -2.7  | 15.6  | 15.8  | 1.0   |
| Graduate degree                         | 6.0   | 13.4  | 65.2  | 6.0   | 14.2  | 69.3  |
| % English language learners             | 42.8  | 37.4  | -17.9 | 42.8  | 35.6  | -25.1 |
| % Receiving free or reduced price lunch | 70.9  | 74.0  | 5.5   | 70.9  | 72.0  | 2.0   |
| Mean API score 2013                     | 761.3 | 769.9 | 1.6   | 761.3 | 771.1 | 1.8   |
| Mean API score 2012                     | 772.3 | 792.0 | 3.5   | 772.3 | 794.2 | 3.9   |
| Mean CST score - English                | 349.1 | 352.0 | 1.2   | 349.1 | 353.4 | 1.7   |
| % Advanced CST score - English          | 21.3  | 23.1  | 9.3   | 21.3  | 23.9  | 13.3  |
| % Basic CST score - English             | 29.5  | 27.6  | -9.7  | 29.5  | 27.4  | -10.4 |
| Mean CST score - Math                   | 367.8 | 382.1 | 5.3   | 367.8 | 381.0 | 4.9   |
| % Advanced CST score - Math             | 27.2  | 33.7  | 25.5  | 27.2  | 33.8  | 25.7  |
| % Basic CST score - Math                | 22.4  | 20.4  | -13.3 | 22.4  | 20.8  | -10.4 |

Data from 2013-14 from the California Department of Education. "All schools" includes 50 intervention schools and 34 comparison schools. "Matched schools" includes 34 intervention schools and 34 comparison schools. The standardized difference =  $(\mu_i - \mu_c) / [(S_i^2 + S_c^2) / 2] \times 100$ , where  $\mu_i$  is the mean in the intervention group,  $\mu_c$  is the mean in the comparison district,  $S_i^2$  is the standard deviation in the intervention district, and  $S_c^2$  is the standard deviation in the control group. When the SD=0, the means are equal, and when SD=100, there is a one standard deviation difference.
