# Supplementary material for: Evaluation of a city-wide school-located influenza vaccination program in Oakland, California, with respect to vaccination coverage, school absences, and laboratory-confirmed influenza: A matched cohort study
Source: PubMed Central journal article supplement (PMC7433855; doi:10.1371/journal.pmed.1003238), 2020-08-18
Supplement: pmed.1003238.s008.pdf [file pmed.1003238.s008.pdf]

*Appendix to Evaluation of a city-wide school-located influenza vaccination program in Oakland, California with respect to vaccination coverage, school absences, and laboratory-confirmed influenza: a matched cohort study*

**S2 Figure. Vaccine coverage survey participant flow**

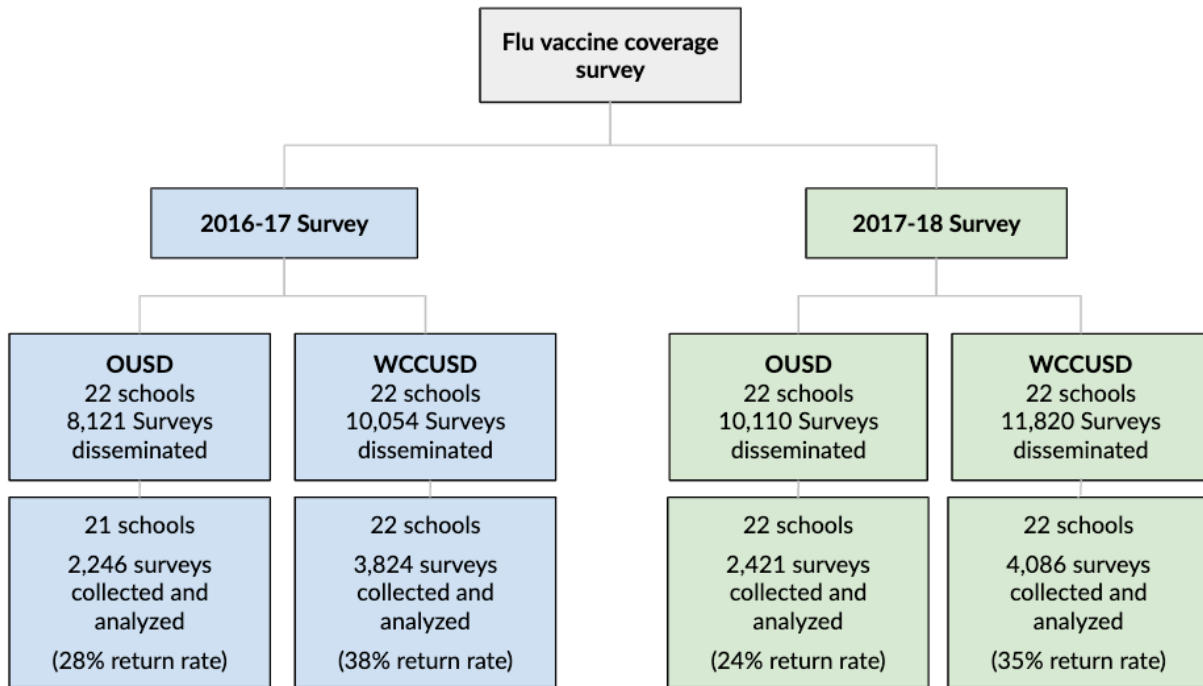

Note: analyses of 2016-17 data comparing OUSD and WCCUSD dropped the school with no accompanying matched pair and included 42 schools.
