# Supplementary material for: Evaluation of a city-wide school-located influenza vaccination program in Oakland, California, with respect to vaccination coverage, school absences, and laboratory-confirmed influenza: A matched cohort study
Source: PubMed Central journal article supplement (PMC7433855; doi:10.1371/journal.pmed.1003238), 2020-08-18
Supplement: pmed.1003238.s009.pdf [file pmed.1003238.s009.pdf]

Appendix to *Evaluation of a city-wide school-located influenza vaccination program in Oakland, California with respect to vaccination coverage, school absences, and laboratory-confirmed influenza: a matched cohort study*

**S3 Figure. Standardized percent of students vaccinated for influenza from all sources among elementary school students in 44 OUSD and WCCUSD schools for 2014-2018**

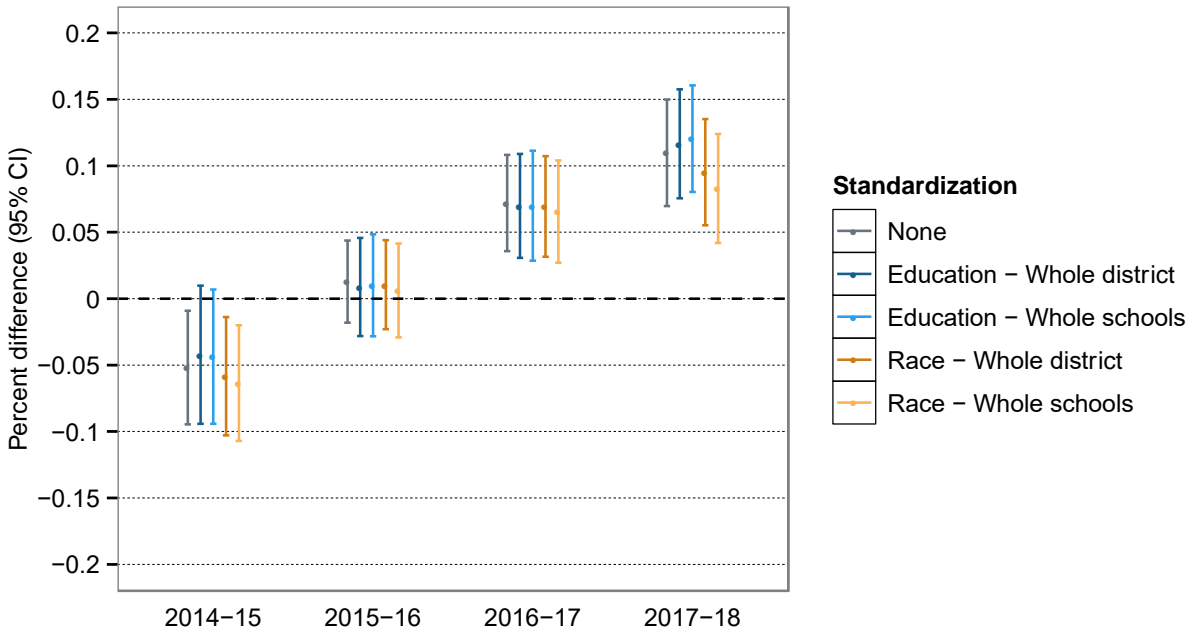

“Whole district” indicates that the data was re-weighted to represent the caregiver education level or student race distributions in the entire school district (50 intervention schools, 34 comparison schools). “Whole schools” indicates that the data was re-weighted to represent the caregiver education level or student race distributions in all the 44 matched schools included in the vaccine coverage survey.
