# Supplementary material for: Evaluation of a city-wide school-located influenza vaccination program in Oakland, California, with respect to vaccination coverage, school absences, and laboratory-confirmed influenza: A matched cohort study
Source: PubMed Central journal article supplement (PMC7433855; doi:10.1371/journal.pmed.1003238), 2020-08-18
Supplement: pmed.1003238.s023.pdf [file pmed.1003238.s023.pdf]

Appendix to *Evaluation of a city-wide school-located influenza vaccination program in Oakland, California with respect to vaccination coverage, school absences, and laboratory-confirmed influenza: a matched cohort study*

**S1 Table. Influenza vaccines delivered by the SLIV intervention each year**

| Year | Schools invited to participate | Schools that participated (%) | Students eligible <sup>a</sup> | Students vaccinated with LAIV or IIV (%) | % of vaccinated students who received the LAIV (%) | % of vaccinated students who received the IIV (%) | Staff/teachers vaccinated |
|------|--------------------------------|-------------------------------|--------------------------------|------------------------------------------|----------------------------------------------------|---------------------------------------------------|---------------------------|
| 1    | 150 <sup>b</sup>               | 110 (73%)                     | 30,045                         | 7,518 (22%)                              | 87% <sup>c</sup>                                   | 13% <sup>c</sup>                                  | 1,123                     |
| 2    | 180 <sup>d</sup>               | 138 (77%)                     | 35,944                         | 10,106 (28%)                             | 85%                                                | 15%                                               | 1,171                     |
| 3    | 134                            | 102 (76%)                     | 34,214                         | 7,502 (25%)                              | 0%                                                 | 100%                                              | 1,230                     |
| 4    | 110                            | 95 (86%)                      | 34,741                         | 7,536 (22%)                              | 0%                                                 | 100%                                              | 1,279                     |

<sup>a</sup> Students eligible is the total students enrolled at the beginning of the school year in the school participating in Shoo the Flu.

<sup>b</sup> Included 28 pre-schools

<sup>c</sup> The percentage of first vaccination doses. A small number of students received more than one dose in 2014-15.

<sup>d</sup> Included 27 pre-schools
