# Supplementary material for: Evaluation of a city-wide school-located influenza vaccination program in Oakland, California, with respect to vaccination coverage, school absences, and laboratory-confirmed influenza: A matched cohort study
Source: PubMed Central journal article supplement (PMC7433855; doi:10.1371/journal.pmed.1003238), 2020-08-18
Supplement: pmed.1003238.s024.pdf [file pmed.1003238.s024.pdf]

*Appendix to Evaluation of a city-wide school-located influenza vaccination program in Oakland, California with respect to vaccination coverage, school absences, and laboratory-confirmed influenza: a matched cohort study*

**S2 Table. Percentage of elementary students vaccinated for influenza by vaccination location in each district**

| <b>Site</b>  | <b>Vaccine type</b>             | <b>2014-15</b>    | <b>2015-16</b>    | <b>2016-17</b>    | <b>2017-18</b>    |
|--------------|---------------------------------|-------------------|-------------------|-------------------|-------------------|
| Comparison   | Doctor's office / health clinic | 57.8 (54.7, 60.8) | 60.5 (58.1, 62.9) | 51.9 (49.2, 54.7) | 49.6 (46.6, 52.6) |
|              | School                          | 1.1 (0.7, 1.5)    | 0.5 (0.2, 0.7)    | 0.3 (0.1, 0.4)    | 0.3 (0.1, 0.5)    |
|              | Other                           | 2.9 (2.4, 3.4)    | 3.2 (2.5, 3.8)    | 3.0 (2.5, 3.5)    | 1.8 (1.4, 2.3)    |
|              | Error/Missing/Don't know        | 2.4 (1.8, 2.9)    | 1.8 (1.2, 2.4)    | 1.2 (0.8, 1.5)    | 1.6 (1.1, 2.1)    |
| Intervention | Doctor's office / health clinic | 42.1 (38.5, 45.7) | 41.2 (38.6, 43.9) | 37.4 (35.0, 39.8) | 35.5 (32.5, 38.5) |
|              | School                          | 13.6 (11.0, 16.2) | 22.8 (19.8, 25.7) | 24.2 (20.3, 28.2) | 26.2 (21.5, 30.9) |
|              | Other                           | 0.7 (0.4, 1.0)    | 0.7 (0.4, 1.0)    | 0.5 (0.2, 0.9)    | 1.2 (0.8, 1.6)    |
|              | Error/Missing/Don't know        | 2.8 (2.0, 3.7)    | 2.9 (2.0, 3.9)    | 1.8 (1.1, 2.5)    | 1.4 (0.9, 2.0)    |
