# Supplementary material for: Evaluation of a city-wide school-located influenza vaccination program in Oakland, California, with respect to vaccination coverage, school absences, and laboratory-confirmed influenza: A matched cohort study
Source: PubMed Central journal article supplement (PMC7433855; doi:10.1371/journal.pmed.1003238), 2020-08-18
Supplement: pmed.1003238.s025.pdf [file pmed.1003238.s025.pdf]

*Appendix to Evaluation of a city-wide school-located influenza vaccination program in Oakland, California with respect to vaccination coverage, school absences, and laboratory-confirmed influenza: a matched cohort study*

**S3 Table. Percentage of elementary students whose caregiver reported they were vaccinated for influenza by vaccine type in each district**

| Site         | Vaccine type                 | 2014-15           | 2015-16           | 2016-17           | 2017-18           |
|--------------|------------------------------|-------------------|-------------------|-------------------|-------------------|
| Comparison   | Shot                         | 48.4 (46.1, 50.8) | 52.2 (50.7, 53.7) | 51.5 (48.6, 54.4) | 53.4 (50.7, 56.1) |
| Comparison   | Spray                        | 12.4 (10.3, 14.6) | 11.6 (9.9, 13.3)  | -- <sup>a</sup>   | -- <sup>a</sup>   |
| Comparison   | Error/Missing/<br>Don't know | 3.2 (2.6, 3.8)    | 2.1 (1.6, 2.6)    | 4.9 (4.1, 5.7)    | 3.0 (2.3, 3.8)    |
| Intervention | Shot                         | 35.8 (32.9, 38.6) | 39.1 (35.5, 42.8) | 52.4 (49.2, 55.6) | 64.4 (59.7, 69.0) |
| Intervention | Spray                        | 18.6 (14.5, 22.6) | 22.5 (18.5, 26.5) | -- <sup>a</sup>   | -- <sup>a</sup>   |
| Intervention | Error/Missing/<br>Don't know | 4.9 (3.8, 6.0)    | 5.9 (4.5, 7.4)    | 11.6 (9.2, 13.9)  | 3.1 (2.2, 3.9)    |

<sup>a</sup> The spray (live attenuated) vaccine was not available 2016-17 or 20.
