# Supplementary material for: Evaluation of a city-wide school-located influenza vaccination program in Oakland, California, with respect to vaccination coverage, school absences, and laboratory-confirmed influenza: A matched cohort study
Source: PubMed Central journal article supplement (PMC7433855; doi:10.1371/journal.pmed.1003238), 2020-08-18
Supplement: pmed.1003238.s026.pdf [file pmed.1003238.s026.pdf]

*Appendix to Evaluation of a city-wide school-located influenza vaccination program in Oakland, California with respect to vaccination coverage, school absences, and laboratory-confirmed influenza: a matched cohort study*

**S4 Table. Difference-in-differences in cumulative incidence and total number of laboratory-confirmed influenza hospitalization per 100,000 during influenza season**

|              | Indirect effect                                                     |         |                        |         | Overall effect       |         |
|--------------|---------------------------------------------------------------------|---------|------------------------|---------|----------------------|---------|
| Season       | Non-elementary age<br>(0-4, >14 years)                              |         | Elderly<br>(≥65 years) |         | All ages             |         |
| Person-years | 2,493,828                                                           |         | 324,752                |         | 2,812,600            |         |
|              | Estimate<br>(95% CI)                                                | p-value | Estimate<br>(95% CI)   | p-value | Estimate<br>(95% CI) | p-value |
|              | <b>Difference-in-differences in cumulative incidence (95% CI)</b>   |         |                        |         |                      |         |
| 2014-15      | -10 (-20, 0)                                                        | 0.057   | -3 (-58, 51)           | 0.904   | -8 (-17, 1)          | 0.084   |
| 2015-16      | -5 (-12, 3)                                                         | 0.210   | -38 (-77, 1)           | 0.057   | -4 (-11, 2)          | 0.188   |
| 2016-17      | -17 (-30, -4)                                                       | 0.008   | -73 (-147, 1)          | 0.054   | -15 (-26, -3)        | 0.011   |
| 2017-18      | -37 (-54, -19)                                                      | <0.001  | -160 (-267, -53)       | 0.004   | -32 (-48, -17)       | <0.001  |
|              | <b>Difference-in-differences in total hospitalizations (95% CI)</b> |         |                        |         |                      |         |
| 2014-15      | -43 (-88, 1)                                                        | 0.057   | -15 (-259, 229)        | 0.904   | -35 (-76, 5)         | 0.084   |
| 2015-16      | -21 (-53, 12)                                                       | 0.210   | -171 (-347, 5)         | 0.057   | -19 (-48, 10)        | 0.188   |
| 2016-17      | -76 (-133, -20)                                                     | 0.008   | -327 (-659, 5)         | 0.054   | -65 (-115, -15)      | 0.011   |
| 2017-18      | -165 (-243, -86)                                                    | <0.001  | -715 (-1195, -236)     | 0.004   | -143 (-213, -74)     | <0.001  |

Difference-in-differences compare the difference in incidence in the intervention group during a program year to the incidence in the intervention group in three pre-program years (2011-2013) to the analogous differences in the comparison group. Analyses were restricted to influenza season, defined as the period following at least two consecutive weeks in which the percentage of medical visits for influenza-like illness in California as reported by the California Department of Public Health exceeded 2.5% and prior to at least two consecutive weeks in which the percentage was less than or equal to 2.5%. Parameters were estimated using a log-linear Poisson model with an offset for population size. Standard errors and 95% confidence intervals were obtained using the delta method.
